# Supplementary material for: High throughput computational and experimental methods for accelerated electrochemical materials discovery
Source: Royal Society of Chemistry journal article supplement (doi:10.1039/d5ta00331h), 2025-01-01
Supplement: d5ta00331h1.xlsx [file d5ta00331h1.xlsx]

## Sheet: Computational
	Table S1. Expanded summary of computational methods, models, DFT descriptors, ML algorithms, and ML training data utilized for HT screening of catalysts, ionomers and electrolytes. "Y" implies yes to a tool or method being used while "N" implies no. All other acronyms not previously defined in the main text are listed at the end of the table.
	Material	Rxn(s)	Model(s)							Descriptor(s)	ML Algorithm(s)		ML Training Data	Suggested Material(s)		Year	DOI
			DFT	ML	Software	Functional	Dispersion	Solvation	U
	Catalyst	eCO2RR	✔	✔	VASP	PBE	N	N	N	ΔGCO ΔGCHO ΔGOH Limiting potential differences	ETR SVM GBR	GPR KRR XGB	∼10,300 data points of unique adsorption energies	CrN TiN Cr3N2 Cr2N CoN		2023	10.1021/acscatal.3c01249
	Catalyst	eCO2RR	✔	✔	Quantum Espresso	PBE	N	Y	N	ΔGCO	ANN		All available datasets of 2nd generation core–shell alloys	None stated		2015	10.1021/acs.jpclett.5b01660
	Catalyst	eCO2RR	✔		VASP	PBE	Y	N	N	ΔGCO ΔGOOH/CHO	N/A		N/A	N6V4-AgCr		2021	10.1021/acs.jpcc.0c10802
	Catalyst	eCO2RR	✔		VASP	opt-PBE	Y	Y	N	ΔGCO ΔGOH	N/A		N/A	None stated		2020	10.1002/jcc.26182
	Catalyst	HER	✔		VASP	PBE/vdW-optB88	Y	N	N	ΔGH	N/A		N/A	NbS2 Ba2Cu2 C8 Pr4C2Cl5 Ce4C2Br5	IrTe2 NbSe2 Ti2Se2 TaSe2	2020	10.1021/acsenergylett.0c00957
	Catalyst	HER	✔	✔	VASP	PBE	Y	N	Y	Zero band gap Thermodynamic stability Low vacancy formation energy ΔGH	LSR GBR RFR ANN		46 2D transition-metal dichalcogenides	VS2 NiS2 ZrTe2 PdTe	MnS2 CrSe2 TiTe2 VSe2	2021	10.1021/acs.jpclett.0c03839
	Catalyst	HER	✔	✔	VASP	PBE	N	N	N	ΔGH	RNN KRR	SVM RF	299 MXene materials	OsB2 Sc-N		2020	10.1021/acs.jpcc.0c02265
	Catalyst	HER	✔	✔	VASP	PBE	Y	Y	N	Thermodynamic stability energy Dissolution potential ΔGH	AB CBC RNC LR HGB Bagging LGBM	GBR XRT RF DT SVM KNN XGB	~364 g-C3N4 materialswith heteroatom doping	Pd@B4 Ru@N2C2 Pt@B2N2 Fe@N3	Fe@P3 Mn@P4 Fe@P4	2022	10.1039/D1TA09878K
	Catalyst	HER	✔		VASP	PBE	Y	N	N	ΔGH	N/A		N/A	Zn@MoSvaSe Cd@MoSvaSe Co@MovaSSe		2021	10.1016/j.ijhydene.2020.12.1480
	Catalyst	HER	✔	✔	VASP	PBE	Y	N	Y	Rotation angle of heterojunctions	LAS		192 energy data points obtained from 48 optimized systems	MoTe2/WTe2		2020	10.1021/acs.jpclett.9b03875
	Catalyst	HER	✔		VASP	PBE/HSE06	Y	N	N	Number of valence e- x electronegativity of dopants ΔGH	N/A		N/A	None stated		2022	10.1039/D2TA04254A
	Catalyst	HER	✔		VASP	PBE	N	N	N	Strain energy (includes ΔGH, exchange current, overpotential, TOF)	N/A		N/A	Fe-N-SWCNT		2023	10.1016/j.apsusc.2023.158225
	Catalyst	HER	✔	✔	VASP	PBE	N	N	N	“Frozen” ΔGH Relaxation energy	GBDT ANN		600 amorphous surfaces and their corresponding hydrogen adsorption structures	None stated		2020	10.1021/acs.jpcc.0c00406
	Catalyst	HER	✔	✔	VASP	LDA	N	N	N	Distance contribution descriptor	SVM		ΔGH of 46,000 ∗H binding sites on the Pt@PdNiCuP surface	Pt33Pd17Ni15.5Cu16P18.5		2023	10.1016/j.cclet.2022.107833
	Catalyst	HER	✔	✔	VASP	PBE	Y	N	N	Variety (22)	RF AB KNN KRR PLS	LSR RDG GBR MLP SVM	540 CN/MX2 heterostructure configurations	CN/MX2 heterostructures w/ Sc and Ti intercolated		2024	10.1021/acsami.3c17389
	Catalyst	HER	✔	✔	VASP	PBE	Y	N	N	ΔGH	AB ENR GBR KNN	KRR LAS PLS RF RDG	4500 MM’XT2-type Mxenes	28 promising materials in SI		2023	10.1039/D3TA00344B
	Catalyst	HER	✔	✔	Quantum Espresso	PBE	N	N	N	ΔGH Cohesive energy	RF ANN SVM	LAS KNN BO	264 MXenes	Ti3C2I2-Ir Ti3C2Br2-Cu Ti3C2Br2-Pt Ti3C2Cl2-Cu	Ti3C2Cl2-Pt Ti3C2Se2-Au Ti3C2Te2-Nb	2022	10.1002/qua.27055
	Catalyst	HER NORR	✔		DMol3	PBE	Y	Y	N	Adsorption energy Limiting potential Ratio of d-band center + ratio of work function	N/A		N/A	Co-pyromellitic dithioanhydride (HER) Co-3,8-phenanthroline-5,6-dione (NORR) Co-phenan-thraquinone (NORR)		2023	10.1016/j.carbon.2024.119006
	Catalyst	HER ORR	✔	✔	VASP	RPBE	N	N	N	ΔGCO ΔGH ΔGO	GNN		3984 distinct structures for H adsorption and 2313 distinct structures for CO adsorption	Cu3Pt FeCuPt2		2021	10.1021/acs.jpclett.1c01851
	Catalyst	HER OER	✔	✔	VASP	PBE	Y	N	N	ΔGH ΔQCu-Cu	ANN		420 adsorption free energies	None stated		2021	10.1038/s41524-021-00514-8
	Catalyst	NRR	✔	✔	Q-chem	B3LYP	N	Y	N	Segregation energy Herfindahl-Hirschman Index ΔGN	RF		441 SAA systems	Zr1Cr Hf1Cr		2024	10.1039/d3dd00244f
	Catalyst	NRR	✔	✔	GPAW	BEEF-vdW	Y	N	N	Isolated electron number of d orbitals	BRT		126 single atom catalysts	Mo, W		2021	10.1016/j.checat.2021.03.003
	Catalyst	NRR	✔		VASP	PBE	Y	N	N	Binding energy between metal atoms Cohesive energy ΔGN Limiting potential	N/A		N/A	Mo@BM-β12 Mn@BM-β12		2021	10.1021/acsami.0c20553
	Catalyst	OER	✔		DMol3	PBE	Y	Y	N	Pourbaix (Nernst eqn) ΔGO ΔGOH	N/A		N/A	Co-Ir Fe-Ir Mo-Ir		2020	10.1021/acsami.0c11821
	Catalyst	OER	✔	✔	VASP	PBE	N	N	Y	Transition metal-oxygen bond length First ionization energy	GBR		364 input data points	IrO2 Fe(SbO3)2 Co(SbO3)2 Ni(SbO3)2 FeSbO4	Fe(Sbo3)4 MoWO6 TiSnO4 CoSbO4 Ti(WO4)2	2024	10.1016/j.jechem.2023.12.048
	Catalyst	OER ORR	✔	✔	VASP	PBE	N	N	N	Area-specific resistance	RF		3 elements on the A-site and 4 elements on the B-site, covering 50 elements and totaling 19,072,821 materials	SrZr0.125Nb0.125Co0.625Cu0.125O3 K0.25Sm0.125Sr0.625Nb0.125Co0.75Co0.75O3 Bi0.125Sr0.875Y0.125Ni0.125Co0.75O3		2024	10.1002/aenm.202303684
	Catalyst	OER ORR	✔		VASP	PBE	N	N	N	Cohesive energy ΔGx Elastic constants Phonon distribution Formation energy Dissolution potential	N/A		N/A	IrN2 monolayer		2021	10.1016/j.jcis.2021.05.028
	Catalyst	OER ORR	✔	✔	VASP	PBE/HSE06	Y	Y	N	ΔGOH ΔGOOH ΔGO Coordination number 6 more features	XGB RF ETR GBR		1404 free energy data points	None stated		2024	10.1021/acsami.3c17377
	Catalyst	ORR		✔	N/A	N/A	N/A	N/A	N/A	Itinerant electrons	XGB LGBM ANN		7798 distinct samples	15 different materials		2024	10.1039/d4ta01884b
	Catalyst	ORR	✔		VASP	PBE	N	N	N	Surface energy Segregation energy d-band center ΔGO	N/A		N/A	Ag3(Mn, Fe, or Co) Ag3(Zr, Mo, or Ru) Ag3(Ta, W) Ag-(Mn or Fe) Ag-(Ta or W)		2016	10.1021/acs.energyfuels.6b02991
	Catalyst	ORR	✔		VASP	PBE	N	N	N	Formation energy Single atom binding energy ΔGOH ΔGOOH	N/A		N/A	Co-ON3		2022	10.3389/fchem.2022.873609
	Catalyst	ORR MOR	✔		VASP	HSE06	N	N	N	Oxygen vacancy formation energy Single Pt atom adsorption energy Metal-induced electronic states Charge variation of deposited Pt	N/A		N/A	Dependent		2017	10.1039/c7me00039a
	Ionomer	ORR		✔	N/A	N/A	N/A	N/A	N/A	Proton conductivity Water Uptake Gas Permeability Band gap Thermal decomposition temperature Glass transition temperature Young's modulus	GPR		Several datasets for different ML models	60 new polymer candidates		2023	10.1021/acs.jpcc.2c07666
	Electrolyte		✔		VASP Gaussian	PBE/B3LYP	N	Y	Y	Adiabatic redox energy Vertical redox energy Reorganization energy	N/A		N/A	LiNi0.5Mn1.5O4		2015	10.1088/0957-4484/26/35/354003
	Electrolyte		✔		N/A	N/A	N/A	N/A	N/A	Stoichiometrically valid reactions	N/A		N/A	None stated		2023	10.1039/d2dd00117a
	Electrolyte		✔		Q-chem	B3LYP	N	Y	N	Redox potential Solubility Stability	N/A		N/A	None stated		2015	10.1021/jz502319n
	Electrolyte		✔	✔	DFTB	N	N	N	N	Trajectory	GNN		Between 100 and 2000 IonSolvR frames	None stated		2023	10.1021/acs.jpclett.3c01783
	Electrolyte		MD	✔	N/A	N/A	N/A	N/A	N/A	Ionic conductivity	minGPT 1Ddiffusion Diffusion-LM		6024 different amorphous polymer electrolytes with their ion transport properties computed from MD simulations	None stated		2024	arXiv:2312.06470v2
	Electrolyte		✔	✔	VASP	PBE	N/A	N/A	N/A	Diffusion coefficient	BO		Data set of 98 materials along with their diffusion coefficients at 1000 K using 96 samples obtained from the work of Kahle et al (https://doi.org/10.1039/C9EE02457C)	Li3YBr6		2025	10.1021/acs.jpcc.5c00954
	Electrolyte			✔	softBV	N/A	N/A	N/A	N/A	Ionic conductivity	GNN GBDT		Computationally generated database of 10,148 ionic conductivities sourced from Materials Project and 3 other publications	Li6PBrO5 Li2Ta2O3F6 Li10Mg7Cl24 Li7Cl3O2 Li2SbF5	Li2AsF5 LiZnPSe4 LiHgPSe4 LiBSe2 LiCuBr2	2024	10.1021/acs.chemmater.3c02841
	Electrolyte		MD	✔	N/A	N/A	N/A	N/A	N/A	Ionic conductivity	minGPT		N/A	None stated		2024	arXiv:2312.04013v3
	ETR: Extra-trees regressor						HGB: Histogram-based GBR				MLP: Multilayer perceptron			BO: Bayesian Optimization
	SVM: Support vector machine						LGBM: light gradient boosting machine				ENR: Elastic net regressor
	KRR: Kernel ridge regressor						XRT: Extremely randomized trees				GNN: Graph NN
	XGB: Extreme GBR						DT: Decision trees				NORR: NO reduction reaction
	ANN: Feedforward artificial NN						KNN: k-nearest neighbors				BRT: Boosted-regression-tree
	LSR: Least squares regression						LAS: Lasso regression				MOR: Methanol oxidation reaction
	RNN: Recurrent NN						GBDT: Gradient boosting decision tree				MD: Molecular dynamics
	CBC: CatBoost classifier						AB: AdaBoost				minGPT: Minimal generative pretraining transformer
	RNC: Radius neighbors classifier						PLS: Partial least square				1Ddiffusion: 1D denoising diffusion probabilistic model
	LR: Logistic regression						RDG: Ridge regression				Diffusion-LM: Diffusion language model
