# Supplementary material for: High throughput computational and experimental methods for accelerated electrochemical materials discovery
Source: Royal Society of Chemistry journal article supplement (doi:10.1039/d5ta00331h), 2025-01-01
Supplement: d5ta00331h2.xlsx [file d5ta00331h2.xlsx]

## Sheet: Experimental
	Table S2. Expanded summary of experimental HT methods for electrochemical material discovery, production, synthesis, characterization, and analysis including substrates, electrolyte, current density (i), overpotential (η), Tafel slope, and durability. All other acronyms not previously defined in the main text are listed at the end of the table.
	Material	Rxn(s)	HT Application	Cell(s)	Deposition Method	Substrate	Electrolyte	Best Performance					Year	DOI
								Material(s)	i (mA cm-2)	η (mV)	Tafel Slope (mV/decade)	Stability (h)
	Catalyst	eCO2RR	Electroanalysis	3-electrode	Automated liquid handler deposition robot	Toray 120	1M EMIMBF4 0.5M DI water in acetonitrile	Au6Ag2Cu2	42	Not stated	94	Not studied	2021	10.1038/s41467-021-21342-w
	Catalyst	eCO2RR	Electroanalysis	SECM*	Polishing	N/A	0.1M KCl	Sn/SnO2	120	Not stated	Not studied	Not studied	2020	10.1038/s42004-020-00399-6
	Catalyst	eCO2RR	Synthesis	H-cell	Spin cast	Titanium	0.5M NaHCO3	Cu0.8In0.2	3	Not stated	Not studied	Not studied	2017	10.1002/anie.201612038
	Catalyst	eCO2RR	Material ID Electroanalysis	SFC	Magnetron sputtering	Si/SiO2 wafer	0.1M KHCO3	Pd-Zn	20	Not stated	Not studied	Not studied	2019	10.1021/acscombisci.9b00130
	Catalyst	HER	Production	3-electrode cell	Dip coating	Cu foam	0.5M H2SO4	HC-MoS2/Mo2C	1000	412	60	24	2020	10.1038/s41467-020-17121-8
	Catalyst	HER	Electroanalysis	3-electrode cell	Sputtering	Cu	0.5M H2SO4	Pd63Ni16Fe21	100	83	52	24	2023	10.1016/jallcom.2023.170656
	Catalyst	HER	Electroanalysis	3-electrode cell	Sputtering	Cu wafer	1M KOH	Ni56.5Co35Ti8.5	650	235	82	Not studied	2022	10.1021/acscatal.2c00869
	Catalyst	HER	Synthesis Characterization Electroanalysis	SDC	Sputtering	Si wafer	0.1M KOH	Co56Cr8Fe19Mo7Ni10	Not stated	Not stated	Not studied	Not studied	2022	10.1039/D2TA01652D
	Catalyst	HER	Material ID	SDC Flow cell	Co-sputtering Spray coating	Ni foam	1M KOH	Co23Cu34Mo17Pd14Re12	400	350	Not studied	36	2024	10.1002/adfm.202400180
	Catalyst	HER OER	Synthesis	PEMǂ MEA^	Spark ablation	Nafion 115	DI water	IrO2	200	Not stated	Not studied	150	2022	10.3390/catal12111343
	Catalyst	OER	Synthesis Electroanalysis	Flow cell 3-electrode cell	Drop casted	FTO glass	0.1M KOH 0.05M Kpi 0.5M NaNO3	CoO Co(50%)Ni(50%) CoNiFe(up to 12.5%)	10	635	Not studied	Not studied	2022	10.1016/j.checat.2022.09.019
	Catalyst	OER	Electroanalysis	SDC	Drop casted	FTO glass	0.1M NaOH	Not stated	Not stated	Not stated	Not studied	Not studied	2013	10.1063/1.4790419
	Catalyst	OER	Material ID Electroanalysis Characterization	SDC	Ink jet printing-assisted co-op assembly	FTO glass	1M NaOH	FeO.3Ni0.7Ox Fe0.23C0.13Ni0.07Ti0.57Ox	110 35	450	Not studied	Not studied	2014	10.1149/2.035304jes
	Catalyst	OER	Material ID Electroanalysis	SDC	Inkjet printing	FTO glass	0.1M NaOH	Ni30Fe7Co20Ce43Ox	10	Not stated	80	Not studied	2014	10.1002/celc.201300229
	Catalyst	OER	Material ID Electroanalysis	SDC RDE	Inkjet printing	FTO glass Glassy carbon disk	0.1M NaOH	(Ni0.1La0.1Co0.3Ce0.5)Ox	4.5	363	60	100	2014	10.1002/celc.201402149
	Catalyst	OER	Material ID Electroanalysis	SDC	Reactive co-sputtering	Si-Ti-Pt wafer	1M H2SO4	Mn0.4Sb0.22Sn0.08Ti0.3	37	Not stated	Not studied	Not studied	2023	10.1039/D3TA04899C
	Catalyst	OER	Synthesis Electroanalysis	25 compartment 3- electrode cell	Automated pipetting robot	Pt film	1M KOH	La0.2Sr0.8Fe1-yCoyO3	1	Not stated	Not studied	Not studied	2023	10.2320/matertrans.MT-MG2022006
	Catalyst	OER	Characterization Electroanalysis	SDC	Combinatorial reactive magnetron co-sputtering	FTO glass	0.1M KOH	Ni1-y-zFeyCrzOx	1.3	Not stated	70-115	Not studied	2017	10.1038/srep44192
	Catalyst	OER ORR	Synthesis	Joule heating method (synthesis) 3-electrode cell	Not stated	Glassy carbon (ORR) Carbon cloth (OER)	0.1M KOH	Fe-CoO	10	280	60	11	2023	10.1039/D2TA09161E
	Catalyst	ORR	Electroanalysis	SFC	N/A	Polycrystalline platinum foil	N/A	Not stated	Not stated	Not stated	Not studied	Not studied	2012	10.1149/2.009211jes
	Catalyst	ORR	Synthesis Electroanalysis	SDC RDE RRDE	Drop cast printing	CO2-activated carbon nanofiber films	Saturated KCl 1M KOH	PtPdRhNi PtPdFeCoNi	0.549 mA 0.532 mA	Not stated	32 31	15	2020	10.1073/pnas.1903721117
	Catalyst	ORR	Electroanalysis	Scanning gas diffusion electrode half cell	Ultrasonic spray coating	Freudenberg H23C8	2M HClO4	Pt/C	750	Not stated	61	Not studied	2024	10.1021/acsmeasuresciau.4c00018
	Catalyst	ORR HER	Material ID Electroanalysis	SDC	Co-sputtering	Si/SiO2 wafer	0.1M KOH	Ti14Ni17Cu16Zr21Pd17Hf15 (ORR) Ti11Ni13Cu18Zr17Pd19Hf22 (HER)	9.4x10-4 (ORR) 7.3x10-2 (HER)	Not stated	Not studied	Not studied	2022	10.1007/s12274-021-3637-z
	Catalyst	HER OER IPA oxidation	Synthesis	Customized PEM electrolyzer	Spark ablation	Printed circuit board	0.5M Na2SO4 (PEM) 30% KOH (AEM) 0.1M KHCO3 (alcohol)	NiFe Ni(O)OH	Not stated	Not stated	Not studied	Not studied	2020	10.3390/catal10101165
	Catalyst	IPA oxidation	Electroanalysis	SDC	Combinatorial magnetron co-sputtering Drop cast	Si/SiO2 wafers	0.1M HClO4	Pt1Ru1Ir1.5/C	Not stated	Not stated	Not studied	Not studied	2023	10.1016/j.electacta.2023.142032
	Catalyst	MOR	Electroanalysis	Customized 25 compartment MEA assembly	Not stated	Toray paper GDL	Nafion 117	PtRu	Not stated	Not stated	Not studied	Not studied	2002	10.1016/S0022-0728(02)01144-0
	Gas diffusion electrode	eCO2RR	Electroanalysis	AutoGDE (SFC)	Evaporation	PTFE	1M KHCO3	N/A	75	Not stated	Not studied	Not studied	2024	10.1039d4dd00061g
	Multiple	eCO2RR HER	Electroanalysis	SFC	N/A	N/A	0.1M KHCO3	Cu foil	5	Not stated	Not studied	Not studied	2014	10.1063/1.4896755
	*scanning electrochemical microscopy
	ǂ proton exchange membrane
	^ membrane electrode assembly
	# rotating disk electrode
