# Supplementary material for: High throughput computational and experimental methods for accelerated electrochemical materials discovery
Source: Royal Society of Chemistry journal article supplement (doi:10.1039/d5ta00331h), 2025-01-01
Supplement: d5ta00331h3.xlsx [file d5ta00331h3.xlsx]

## Sheet: Combined
	Table S3. Expanded summary of HT studies that combine both computational and experimental methods for material discovery including model details, ML training data, substrate, and electrolyte. "Y" implies yes to a tool or method being used while "N" implies no. All other acronyms not previously defined in the main text are listed at the end of the table.
	Material	Rxn(s)	Cell(s)	Deposition Method	Substrate	Electrolyte	Model(s)							DFT Descriptor(s)	ML Algorithm	ML Training Data	Best Performance						Year	DOI
							DFT	ML	Software	Functional	Dispersion	Solvation	U				Material(s)		i (mA cm-2)	η (mV)	Tafel Slope (mV/decade)	Stability (h)
	Catalyst	eCO2RR	3-electrode	Not stated	Carbon cloth	0.5M KHCO3	✔		CASTEP	PBE	Y	N	N	Pore limited diameter Coordination unsaturated metal sites Adsorption capacity	N/A	N/A	MOFs⁑:	GAFRUD CAJQEL cg400449c	30	Not stated	Not studied	2.8	2022	10.1021/acscatal.2c05155
	Catalyst	eCO2RR	Flow cell	Drop casted	Carbon paper	1M KOH	✔	✔	VASP	RPBE	N	N	N	ΔGCO ΔGH Formation energy	GNN	50,000 DFT structures from the chemical space of CO2RR	CuAl		60	Not stated	Not studied	24	2024	10.48550/arXiv.2405.18891
	Catalyst	HER	N/A	Electrodeposition Bi UPD Pt-Bi annealing	FTO glass	H2SO4	✔		DACAPO	RPBE98	N	N	N	ΔGH	N/A	N/A	BiPt alloy		Not stated	Not stated	Not studied	Not studied	2006	10.1038/nmat1752
	Catalyst	HER	RDE	Drop casted	Glassy carbon	1M KOH	✔		VASP	PBE	N	N	Y	A-site ionic electronegativity	N/A	N/A	(Gd0.5La0.5)BaCo2O5.5+δ		338	240	27.6	10	2019	10.1038/s41467-019-11847-w
	Catalyst	OER	H-cell	Drop casted	FTO glass	0.5M NaCl		✔	N/A	N/A	N/A	N/A	N/A	N/A	BO	286 samples of 4 element Co-Mn-Fe-Ni system	Co0.2Mn0.7Ni0.1Ox Co0.6Fe0.3Ni0.1Ox		Not stated	Not stated	Not studied	Not studied	2023	10.1039/d3dd00116d
	Catalyst	OER	3-electrode	Not stated	Glassy carbon	0.1M KOH	✔	✔	Gaussian 16	B3LYP/6-31G (d, p)	N	Y	N	Bond length between metal ion & atom 2 Average charge of active site Electron affinity for metal center Ionic radius of active site atom	GBR	100 structures and 23 initial features	Ni covalent organic framework		10	335	55	65	2021	10.1021/jacsau.1c00258
	Catalyst	OER	3-electrode	Spin-coating	FTO glass	4M K2CO3/KHCO3	✔		VASP	RPBE	N	N	Y	Decomposition energy Pourbaix (Nernst Eqn) cubic Pm3m space group	N/A	N/A	LaAlO3		10	510	Not studied	3	2022	10.1038/s41467-022-35478-w
	Catalyst	OER	3-electrode	Electrodeposition	AvCarb MGL 190	1M KOH	✔	✔	VASP	PBE	N	N	Y	Electronic structure (O2p bandcenter, M3d bandcenter, Bader charges) ΔGO ΔGOH ΔGOOH	RF BO LAS	6155 ternary-phase spinel oxides (computational)	Co2.5Ga0.5O4		10	220	56	Not studied	2024	10.1039/D4SC00192C
	Catalyst	ORR	Multi-channel (4) flow double electrode cell RDE	Drop casted	Glassy carbon	0.5M H2SO4		✔	N/A	N/A	N/A	N/A	N/A	N/A	SVM GBR	36 self-generated samples	Fe4.8%Zn95.2%		30.3 (A/gcatalyst)	Not stated	Not studied	Not studied	202	10.1021/acsaem.0c.1466
	Catalyst	ORR	RRDE◊	Drop casted	Glassy carbon	0.1M HClO4	✔		VASP	PBE	N	N	N	ΔGOOH	N/A	N/A	Cobalt Porphyrin		3	40	Not studied	Not studied	2022	10.1038/s41467-022-30523-0
	Catalyst	ORR	SECM RRDE	Printing	Glassy carbon	0.1M HClO5	✔		VASP	PBE	Y	N	Y	ΔGO on Fe	N/A	N/A	FeNiCuCoPt/CNFs		5	Not stated	77	Not studied	2024	10.1002/anie.202407116
	Catalyst	ORR	MEA	Not stated	Toray paper GDL	Not stated	✔		CASTEP	RPBE	N	N	N	d-band center ΔGO ΔGOH	N/A	N/A	Pt3Co		Not stated	Not stated	Not studied	Not studied	2020	10.1039/D0CP00301H
	Catalyst	ORR OER	Sealed glass cell	None	N/A	0.5 M HNO3	✔		VASP	PBE	N	N	Y	Dissolution reaction energy Energy above convex hull	N/A	N/A	26 OER oxide candidates 2 ORR oxide candidates		N/A	N/A	N/A	N/A	2022	10.1021/acs.chemmater.2c01233
	Electrolyte	HER ORR OER	Button cell	N/A	N/A	Various	✔		VASP	PBE	N	N	N	Oxygen vacancy Hydration energy ΔGC2O ΔGH2O	N/A	N/A	BaSnxCe0.8-xYb0.2O3-δ		2620	Not stated	Not studied	1000	2024	10.1002/adma.202311159
	Electrolyte			N/A	N/A	N/A	✔	✔	VASP	PBE	N	N	Y	Li mole fraction Band gap Redox potential Stability Li diffusivity Cost Shear modulus Density	GNN	Materials Project	NaxLi3-xYCl6		N/A	N/A	N/A	N/A	2024	10.1021/jacs.4c03849
	Electrolyte			N/A	N/A	N/A		✔	N/A	N/A	N/A	N/A	N/A	N/A	LR GPR	Self-generated	1,4-dioxane		N/A	N/A	N/A	N/A	2022	10.1002/cmtd.202200008
	Electrolyte			N/A	N/A	N/A	✔		VASP	PBE	N/A	N/A	N/A	Energy above convex hull Reaction energy Band gap Ionic conductivity	N/A	N/A	Li3OCl		N/A	N/A	N/A	2400	2025	10.1038/s41467-025-58522-x
	Electrolyte			N/A	N/A	N/A	✔		N/A	N/A	N/A	N/A	N/A	Li-phonon band center	N/A	N/A	Li3ErCl6 and 17 other candidates		N/A	N/A	N/A	N/A	2019	10.1016/j.isci.2019.05.036
	Electrolyte			N/A	N/A	N/A	✔	✔	Gaussian 16	B3LYP/6-31G (d,p)	N	Y	N	N/A	BO	98 samples of BTZ in various organic solvents	dioxane:dimethyl sulfoxide @ 0.8.0.2 vol%		N/A	N/A	N/A	N/A	2024	10.1038/s41467-024-47070-5
	⁑metal organic framework ◊rotating ring disk electrode LR: Linear regression BTZ: 2,1,3-benzothiadiazole			GNN: Graph NN BO: Bayesian Optimization LAS: Lasso regression SVM: Support vector machine
